# Supplementary material for: Analysis and Functional Verification of PoWRI1 Gene Associated with Oil Accumulation Process in Paeonia ostii
Source: MDPI journal article supplement (doi:10.3390/ijms22136996), 2021-06-29
Supplement: s1 [file s1]

>**PoWRI1**

MKRSASFCSTSSSSCVVVGGELEEKPKPKSKSKAKTQIKRAGKSVPKTLTCARRSSIYRG  
VTKHRWTGRFEAHLWDKSTWNTIQNKKGKQVYLGAYDSEEGAARTYDLAALKYWG  
PATSLNFPIDGYKKDLEEMQDLSKEEYLASLRRKSSGFSRGVSKYRGVARHHHNGRWE  
ARIGRVMGNKYLYLGTFTSQEEAARAYDMAAIQYRGANAVTNFDINNYSASGLKNSL  
RQYPQTKEQPKHLNYSQTRKTEQVEEPPPPPEPEDDQMLNPPPPAPEDDHTPPPQEDD  
QMLNPPSPSPQDHQMMNPCQLENTVRQLLPNCIDSSAIEPAGFSEHDLTWGLCLDTEF  
NPHPVPDTPLENPGELLDFFDDTGFEDNIDLIYGGSSSEDKEVKVVGACADNDGSVQNG  
AEGLSPSPSSVSSITSVFL

>**AtWRI1**

MKKRLTTSTCSSPSSSVSSSTTTSSPIQSEAPRPKRAKRAKKSSPSGDKSHNPTSPASTRR  
SSIYRGVTRHRWTGRFEAHLWDKSSWNSIQNKKGKQVYLGAYDSEEAHAHTYDLAAL  
KYWGPDITLNFPAETYTKLEEMQRTKEEYLASLRRQSSGFSRGVSKYRGVARHHHN  
GRWEARIGRVFGNKYLYLGTYNQEEAAAAYDMAAIEYRGANAVTNFDISNYIDRLK  
KKGVPFPVQANHQEGILVEAKQEVETREAKEEPREEVKQQYVEEPPQEEEEKEEEK  
AEQQEAEIVGYSEEAAVVNCCIDSSTIMEMDRCGDNNELAWNFCMMDTGFSPLTDQ  
NLANENPIEYPELFNELAFEDNIDFMFDDGKHECLNLENLDCCVVGRESPPSSSSPLSC  
LSTDSASSTTTTTTSVSCNYLV

Figure S1. PEST motif analysis of *AtWRI1* and *PoWRI1*. PEST motif analysis was performed by ePESTfind (<http://emboss.bioinformatics.nl/cgi-bin/emboss/epestfind>). Predicted potential PEST motifs are highlighted in yellow.
