# Supplementary material for: Analysis and Functional Verification of PoWRI1 Gene Associated with Oil Accumulation Process in Paeonia ostii
Source: MDPI journal article supplement (doi:10.3390/ijms22136996), 2021-06-29
Supplement: s1 [file s1]

Table S1 **Primers used for PCR and qRT-PCR**

| <b>Name</b>            | <b>Primer (5'-3')</b>                                |
|------------------------|------------------------------------------------------|
| <i>PoWR11</i> -F       | GTGAGATAGAAAGAGGAGGAAGT                              |
| <i>PoWR11</i> -R       | GCCGCAGAGTTTACACGAGCATA                              |
| attB- <i>PoWR11</i> -F | GGGGACAAGTTTGTACAAAAAAGCAGGCTCCATGAAGAGGTCAGCTTCA    |
| attB- <i>PoWR11</i> -R | GGGGACCACTTTGTACAAGAAAGCTGGGTTCGAAAACTGAAGTAATTGAAGA |
| <i>PoWR11</i> -Bsa I-F | CAGTGGTCTCACAACATGAAGAGGTCAGCTTCATT                  |
| <i>PoWR11</i> -Bsa I-R | CAGTGGTCTCATACACAAGAAACTGAAGTAATTG                   |

| <b>Gene ID</b> | <b>Name</b>      | <b>Forward Primer (5'-3')</b> | <b>Reverse primer (5'-3')</b> |
|----------------|------------------|-------------------------------|-------------------------------|
| AK230311.1     | <i>AtActin</i>   | TCTCCCGCTATGTATGTCGC          | TAAGGTCACGTCCAGCAAGG          |
| AT5G15530      | <i>AtBCCP2</i>   | GTGGAACTTGAATAAAGCAGC         | AGGAGAAGGAGGAAGAGCC           |
| AT5G46290      | <i>AtKASI</i>    | CGATGTTGATGCTTACTACG          | TCAAGCCTACGCTCATTCT           |
| AT5G52920      | <i>AtPKP-β1</i>  | CCGCTCGTGTTGAGACTGA           | TCCTCCTCACTGTCGGCTTC          |
| MW930196       | <i>PoWR11</i>    | GAGATAGAAAGAGGAGGAAGT         | TATGCTCGTGTAAACTCTGCG         |
| JN699053       | <i>Ubiquitin</i> | GACCTATACCAAGCCGAAG           | CGTTCCAGCACCACAATC            |
